# Supplementary material for: Gut microbiota-derived gamma-aminobutyric acid from metformin treatment reduces hepatic ischemia/reperfusion injury through inhibiting ferroptosis
Source: eLife journal article supplement (doi:10.7554/elife.89045), 2023-07-03

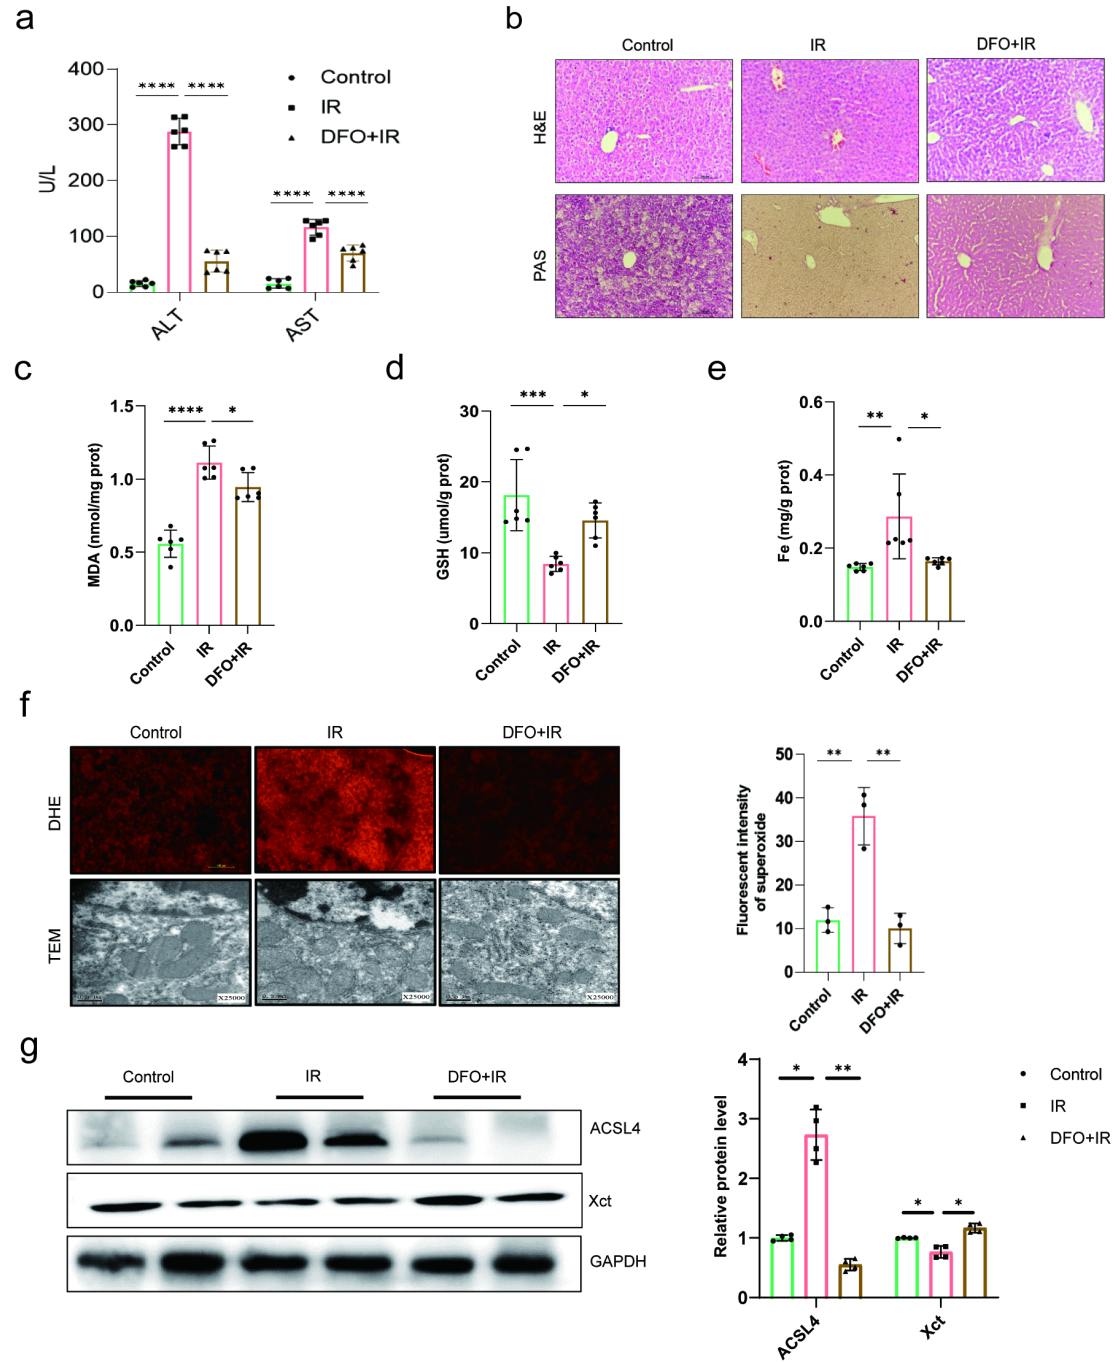

Supplement: supp3 [file elife-89045-supp3-v1.pdf]
