# Supplementary material for: Gut microbiota-derived gamma-aminobutyric acid from metformin treatment reduces hepatic ischemia/reperfusion injury through inhibiting ferroptosis
Source: eLife journal article supplement (doi:10.7554/elife.89045), 2023-07-03
Supplement: supp6 [file elife-89045-supp6-v1.pdf]

共有序列

GQ496624  
MT749282  
AB510697  
MT749285  
Bacteroides caecimuris  
Bacteroides-acidifaciens  
NR\_074277  
MT749287  
Consensus sequence



CAGCCAAGTAGCGTGAAGGATGACTGCCCTATGGGTTGTAAACTTCTTTTATATGGGAATAAA GTGGTCCACGTGTGGANTTTTGTATGTACCATATGAATAAGGATCG 479  
 CAGCCAAGTAGCGTGAAGGATGACTGCCCTATGGGTTGTAAACTTCTTTTATATGGGAATAAA -GTGATCCACGTGTGGATTTTTGTATGTACCATATGAATAAGGATCG 448  
 CAGCCAAGTAGCGTGAAGGATGACTGCCCTATGGGTTGTAAACTTCTTTTATATGGGAATAAA --TGGTCCACGTGTGGATTTTTGTATGTACCATATGAATAAGGATCG 448  
 CAGCCAAGTAGCGTGAAGGATGACTGCCCTATGGGTTGTAAACTTCTTTTATATGGGAATAAAAGTGGTCCACGTGTGGACTTTTTGTATGTACCATATGAATAAGGATCG 488  
 CAGCCAAGTAGCGTGAAGGATGACTGCCCTATGGGTTGTAAACTTCTTTTATAAAGGAATAAA -GTCGGGTATGCATACCCGTTTGCATGACTTTTATGAATAAGGATCG 458  
 CTGCCGATGGGTGGTGGTAAAGGTGGTTCC-----GACTTCTCTCCTCGTGGAAAGTCAAATGCTGAAGTA-----ATGCGCTTTGTACAGTCTGTTTCA 440  
 CTTCTATGGGCGGCGGCAAAGGCGGTTCC-----GATTTCTCTCCACGTGGAAAGAGTGAGCTGAAATCATGCGTTTCTGCCAGGCATTTCAT----- 439  
 CAGCCAAGTAGCGTGAAGGATGACTGCCCTATGGGTTGTAAACTTCTTTTATATGGGGAATAAAAGTTTTCCACGTGTGGATTTTTGTATGTACCATATGAATAAGGATCG 512  
 CAGCAATACCGCGTGAAGTGAAGAAGGTTTT-CGGATCGTAAAGCTCTGTTATTGGGGAAGAAAAA-----TGACGGTACCCAATGAGGAAGTCCC 424  
 -----CCTATGGGTTGTAAACTTCTTTTATATGGGAATAAA--TGGTCCACGTGTGGATTTTTGTATGTACCATATGAATAAGGATCG 81

共有序列

GQ496624  
MT749282  
AB510697  
MT749285  
Bacteroides caecimuris  
Bacteroides-acidifaciens  
NR\_074277  
MT749287  
Consensus sequence



GCTAACTCCGTGCCAGCAGCCGCGGT---AATACGGAGGATCCGAGCGTTATC--CGGATTTATTGGGTTTAAAGGGAGCGTAGGTTGGACAG-TTAAGTCAGTTGTGAAA 583  
 GCTAACTCCGTGCCAGCAGCCGCGGT---AATACGGAGGATCCGAGCGTTATC--CGGATTTATTGGGTTTAAAGGGAGCGTAGGTTGGACAG-TTAAGTCAGTTGTGAAA 552  
 GCTAACTCCGTGCCAGCAGCCGCGGT---AATACGGAGGATCCGAGCGTTATC--CGGATTTATTGGGTTTAAAGGGAGCGTAGGCGGATTG-TTAAGTCAGTTGTGAAA 592  
 GCTAACTCCGTGCCAGCAGCCGCGGT---AATACGGAGGATCCGAGCGTTATC--CGGATTTATTGGGTTTAAAGGGAGCGTAGATGGATGGTTAAGTCAGTTGTGAAA 563  
 GTTGGAACTGTGGCGTCA-CATCGGTCTGAAACGGACGTTCTGCCGGTGACATCGGTGTTGGTGGCCGTGAAG-----TAGGTTTCATG-TTCGGT---ATGTACAA 539  
 GCTGGAATTATGGCGTCA-TCTCGGTCCGACATGGACGTGCTGCCGGTGACATCGGCGTAGGCGGACGTGAAGTAGGC-TATATGTTCCG-----AATGTACAA 538  
 GCTAACTCCGTGCCAGCAGCCGCGGT---AATACGGAGGATCCGAGCGTTATC--CGGATTTATTGGGTTTAAAGGGAGCGTAGGTTGGACAG-TTAAGTCAGTTGTGAAA 616  
 GCTAACTACTTGCCACAGCCGCGGT---AATACGTAGGGAACAAGCGTTGTC--CGGAATGACTGGGCGTAAAGGGCGCGTAGGCGGCTA-TTAATTCTGATGTGAAA 528  
 GCTAACTCCGTGCCAGCAGCCGCGGT---AATACGGAGGATCCGAGCGTTATC--CGGATTTATTGGGTTTAAAGGGA----- 154

|                           |                                                                                     |     |
|---------------------------|-------------------------------------------------------------------------------------|-----|
| Bacteroides clarus-2      | ATATTCTCGTTCACCGAGGCCAAAAGTGCTGG--GCAACTGGACGGGATTCTCCACCAAGCTGTACAGCTCCCTCTTCACG   | 156 |
| Bacteroides caccae        | AGCAAAGCCAGCACTACCACAAAAATAATAGCGGAAAGCGGGCGAAGCTC-----CGGCGTTAAACCACCTTTACG        | 117 |
| Bacteroides clarus        | ATATTCTCGTTCACCGAGGCCAAAAGTGCTGG--GCAACTGGACGGGATTCTCCACCAAGCTGTACAGCTCCCTCTTCACG   | 156 |
| Bacteroides xylanisolvens | ATCTATTCTTTACCGAAGCGAAAGTGCTGG--GCAACTGGACTGGTTTCTCCACAAAACCTTTATACCTTCGCTTTTACG    | 156 |
| Bacteroides ovatus        | AATAACGCCAGTACCACAGACAAAAATGATAGCCGAAAGCGGGCGAAGTTC-----CGGGGTCAAACCTCCCTTTGCG      | 117 |
| Bacteroides finegoldii    | AGCAATGCCAGCACTACAACAAAAATAATGGCAGAAAGCGGGCGAAGTTC-----CGGTGTACAGCCCTCCTTTACG       | 117 |
| Bacteroides fragilis      | ATTTACTCTTTTACCGAGGCCAAAAGTGCTGG--GCAACTGGACCGGATTCTCCACAAAACCTGTATTTCGTCAGTGTTCAGT | 156 |
| Bacteroides caecimuris    | AACAACGCCAGCACTACGACAAAAATAATCGCAGAAAGCGGACGAAGCTC-----CGGTGTCAAACCTCCCTTTGCG       | 117 |
| Consensus sequence        | -----CGGCGTTAAACCACCTTTACG                                                          | 21  |

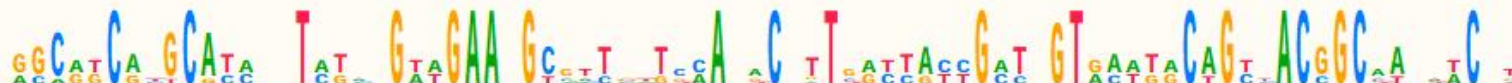

**共有序列**

|                           |                                                                                   |     |
|---------------------------|-----------------------------------------------------------------------------------|-----|
| Bacteroides clarus-2      | GGCGGCATGCACCACTCGCTGATGAACGCCATCTGGAACACATTTCGCCATTGCCA-TGCTGGCAGCCACCGCCAGTACGG | 235 |
| Bacteroides caccae        | GGCATCA-GCATATATATAAGTAGAAAGTGTT--TCCAAGCCTTGTTACCGATAGTAAATACAGTTACGGCAAATCAT    | 194 |
| Bacteroides clarus        | GGCGGCATGCACCACTCGCTGATGAACGCCATCTGGAACACATTTCGCCATTGCCA-TGCTGGCAGCCACCGCCAGTACGG | 235 |
| Bacteroides xylanisolvens | ACAGGCACGCATCATTCTTTGATGAATGCATTGATTAACACGATTACTATTGCTC-TGCTGGCTGCAACGGCATCTACCT  | 235 |
| Bacteroides ovatus        | GGCATCG-GCGTAGATATAAGTAGAAAGCGTT--TCCAAACCTTGATTACCGATAGTGAATACAGTTACGGCAAATCAT   | 194 |
| Bacteroides finegoldii    | GGCATCG-GCATAAATATAGGTAGAAAGCGTC--TCCAATCCTTGATTGCCGATGGTAAATACAGTCACGGCAAATCAT   | 194 |
| Bacteroides fragilis      | ACCGGCACCTCACCATTTCGCTGATGAATGCCTGATCAATACTGTGACCATTGCTT-TGATTGCAGCTACGGCTTCCACC  | 235 |
| Bacteroides caecimuris    | AGCATCG-GCATAGATATAAGTAGAAAGCGTC--TCCAGACCTTGATTGCCGATGGTAAATACTGTTACGGCAAATCAT   | 194 |
| Consensus sequence        | GGCATCA-GCATATATATAAGTAGAAAGTGTT--TCCAAGCCTTGTTACCGATAGTAAATACAGTTACGGCAAATCAT    | 98  |

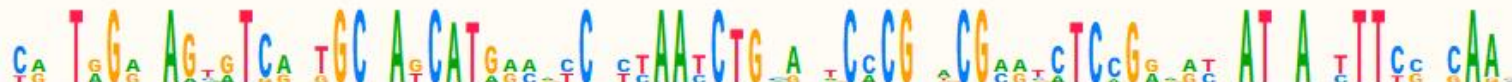

**共有序列**

|                           |                                                                                   |     |
|---------------------------|-----------------------------------------------------------------------------------|-----|
| Bacteroides clarus-2      | CGTTGGGCAGCATCGCGGCCATC--GGCATCTTCAACCTGCGCACACGCACGCGTC---AGGTGATGAACCTTCGCCAAC  | 309 |
| Bacteroides caccae        | CAATAGAGAGTGTCAATGCAAGCATGAAGCCACTAATC---ATTCCCGGACGAACCTCCGGAATAATTACTTTCCACAAG  | 271 |
| Bacteroides clarus        | CGTTGGGCAGCATCGCGGCCATC--GGCATCTTCAACCTGCGCACACGCACGCGTC---AGGTAATGAACCTTCGCCAAC  | 309 |
| Bacteroides xylanisolvens | TGCTGGGTAGTGTGGCTGCTATC--GGCATCTTTAATCTGAAATCCCCTTCGCGTA---AAGCGATTAGTTTTGTGAAT   | 309 |
| Bacteroides ovatus        | CAATGGATAGTGTCAAGTGAAGCATAAAGCCGCTAATC---ATTCCCGGACGAATCTCCGGAATTATGACTTTCCACAAG  | 271 |
| Bacteroides finegoldii    | CAATAGACAGAGTCAATGCGCAGCATGAATCCACTAATC---ATTCCCGGACGAATCTCAGGAACAATCACTTTCCACAGG | 271 |
| Bacteroides fragilis      | TGCTGGGGAGTATCACTGCTATC--GGCATCTTCAACCTGAAGGCACGTTTCGCGGA---AGGCCATCAGCTTTGTGAAC  | 309 |
| Bacteroides caecimuris    | CAATAGATAAATGTCAATGCAAGCATAAAACCCTAATC---ATTCCCGGCGAATCTCCGGCACAAATGACTTTCCACAAG  | 271 |
