# Supplementary material for: Gut microbiota-derived gamma-aminobutyric acid from metformin treatment reduces hepatic ischemia/reperfusion injury through inhibiting ferroptosis
Source: eLife. 2024 Mar 15;12:RP89045. doi: 10.7554/eLife.89045 (PMC10942780; doi:10.7554/eLife.89045)
Supplement: Supplementary file 1. [file elife-89045-supp1.xlsx]

## Sheet: Sheet1
genes	Forward primer (5'→3')	Reverse primer (5'→3')
Il-6	TCACAGAAGGAGTGGCTAAGGACC	ACGCACTAGGTTTGCCGAGTAGAT
Il-1β	TGTGTTTTCCTCCTTGCCTCTGAT	TGCTGCCTAATGTCCCCTTGAAT
Il-18	GTGAACCCCAGACCAGACTG	CCTGGAACACGTTTCTGAAAGA
Slc7a11	TGGGTGGAACTGCTCGTAAT	AGGATGTAGCGTCCAAATGC
Slc39a14	AACGACAGCTTTCTGGTCCC	CCGATCTGAATCTGCCCTGA
Acsl4	GGCTATGACGCCCCTCTTTG	GAATCGGTGTGTCTGAGGGG
Cox-2	TTGGAGGCGAAGTGGGTTTT	TGGGAGGCACTTGCATTGAT
Zo-1	GCACGGACAGTAGACACACT	CAGAGGACCGTGTAATGGCA
Occludin	CCCAGATTAGAGTCCAAAGTCAGT	CGGAAACCTTAGAGAGATGCC
Claudin1	GGAGTCAGTGTTTCAGCCTATGGT	GAAGGGTTCATGCCTCTCATCT
Jam1	ATCCACCTCACTGTGCTTG	TTCTTGGCATCTGCTGTAAG
Jam4	GGTACAGTTCGGATGAGGCA	ATAAGGAAGGCTACTGCTGCG
β-actin	CTAAGGCCAACCGTGAAAAG	GGTACGACCAGAGGCATACA
