# Supplementary material for: Gut microbiota-derived gamma-aminobutyric acid from metformin treatment reduces hepatic ischemia/reperfusion injury through inhibiting ferroptosis
Source: eLife. 2024 Mar 15;12:RP89045. doi: 10.7554/eLife.89045 (PMC10942780; doi:10.7554/eLife.89045)
Supplement: Supplementary file 2. [file elife-89045-supp2.xlsx]

## Sheet: Sheet1
Antibiotics	Company Name	Item No.
penicillin	Aladdin Chemical Reagent Company	P105489
neomycin sulfate	Aladdin Chemical Reagent Company	N109017
metronidazole	Aladdin Chemical Reagent Company	M109874
gentamicin	Aladdin Chemical Reagent Company	G302822
