# Supplementary figures and images for: Gut microbiota-derived gamma-aminobutyric acid from metformin treatment reduces hepatic ischemia/reperfusion injury through inhibiting ferroptosis
Source: eLife journal article supplement (doi:10.7554/elife.89045), 2023-07-03

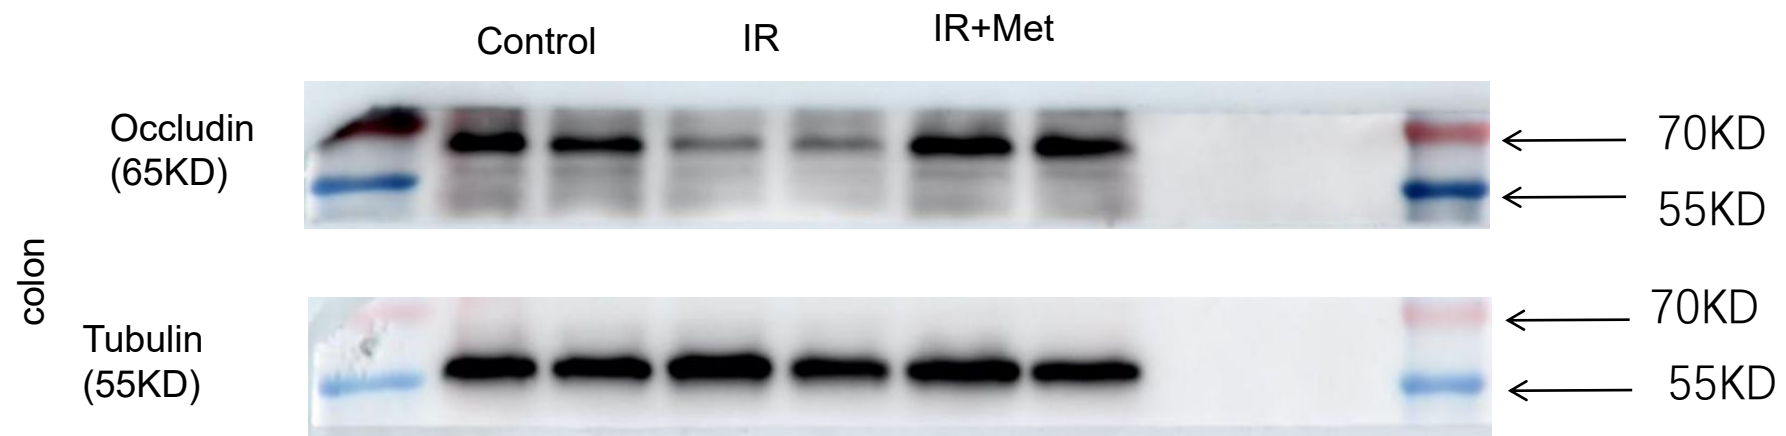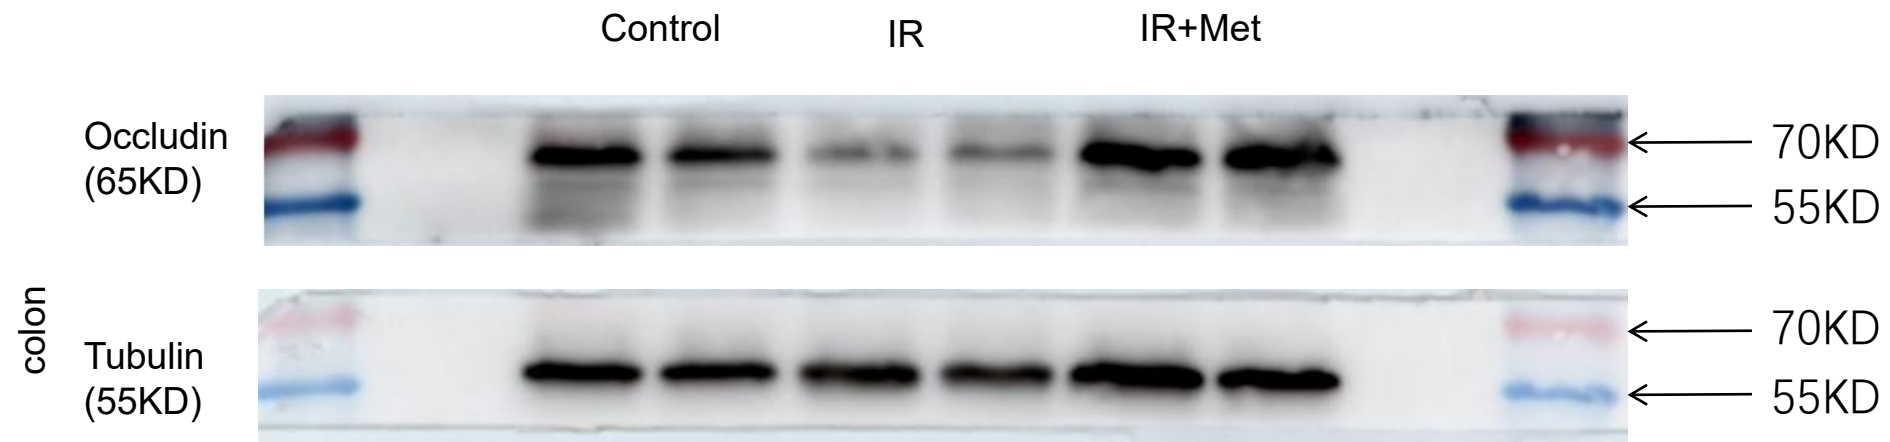

Supplement: fig1-data2 [file elife-89045-fig1-data2-v1.zip]

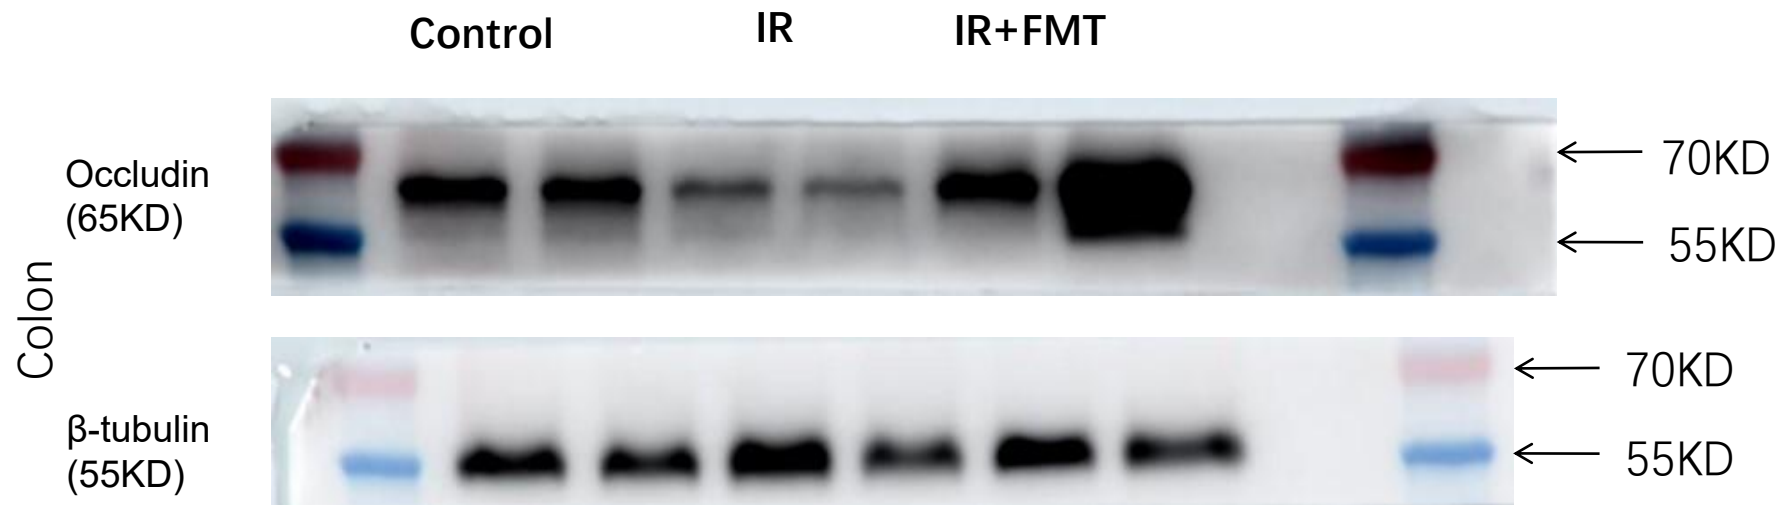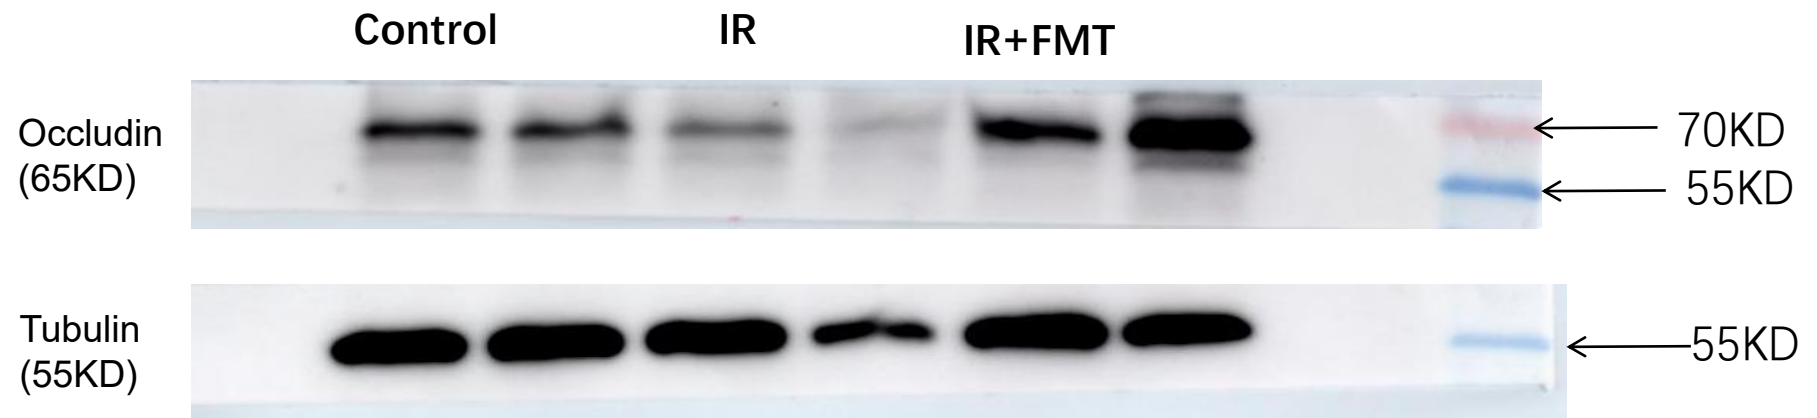

Supplement: fig2-data2 [file elife-89045-fig2-data2-v1.zip]

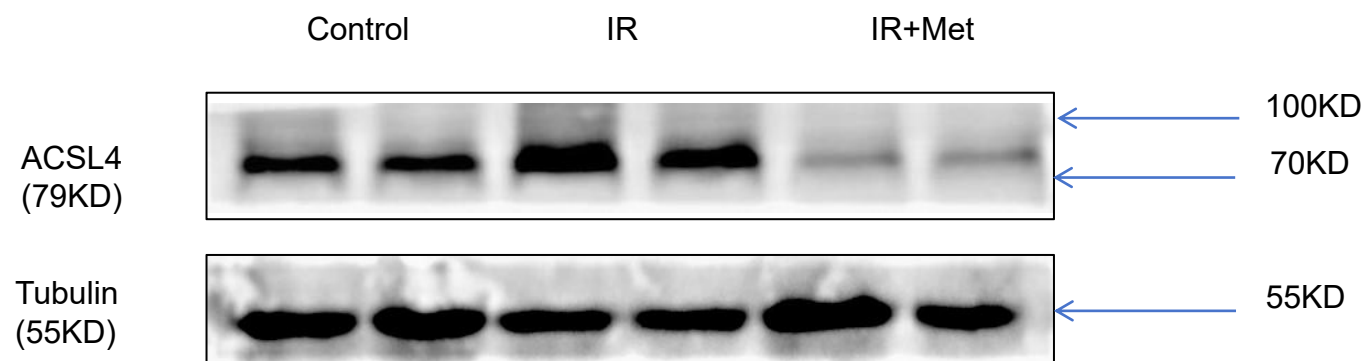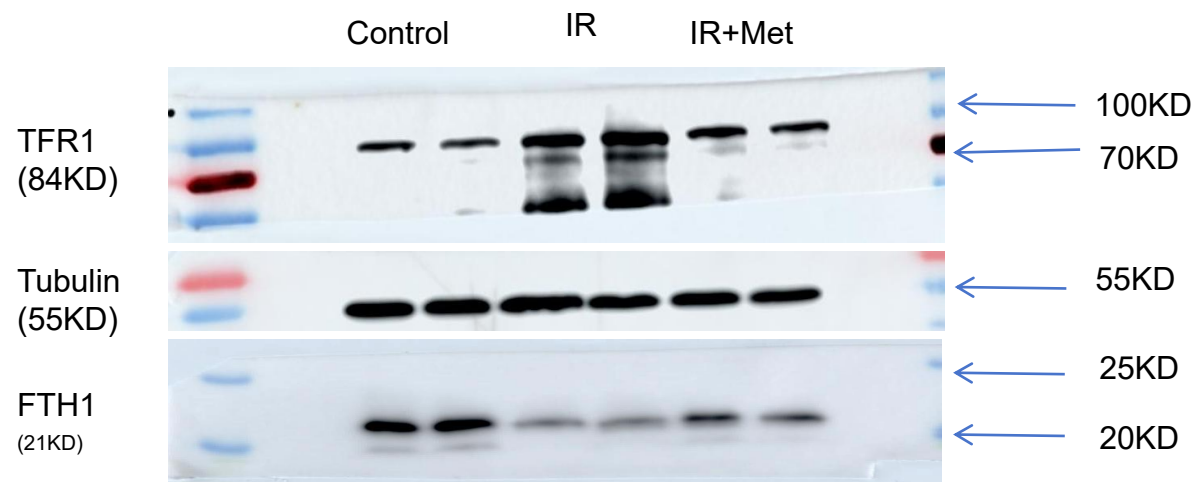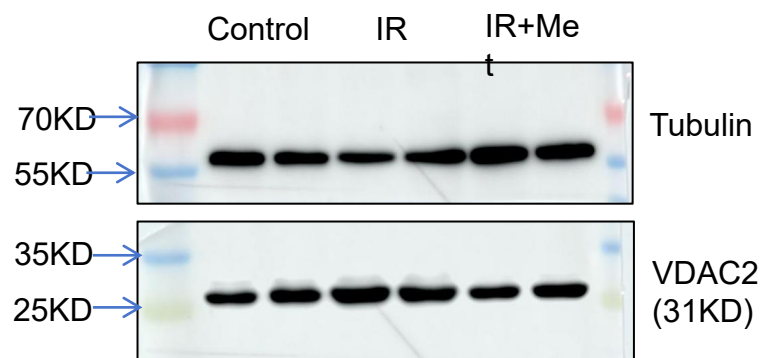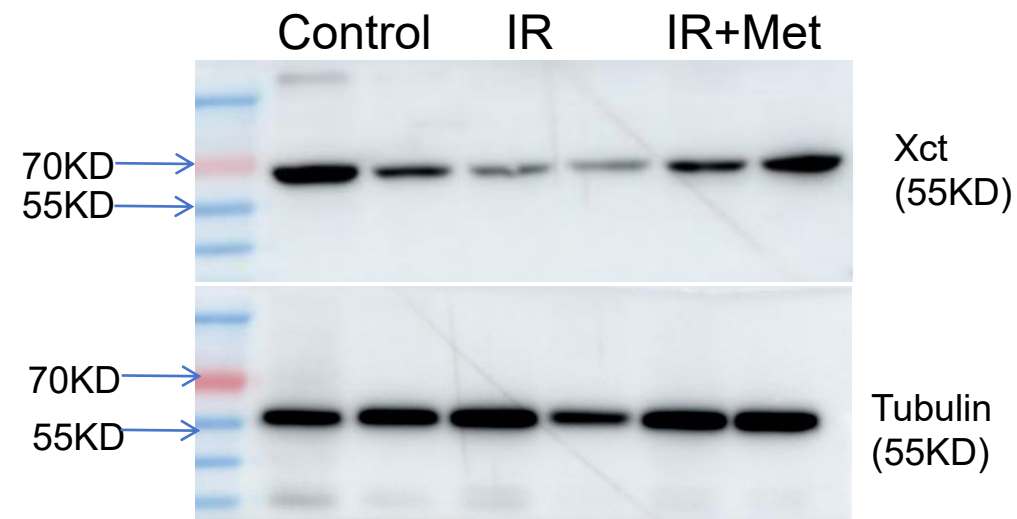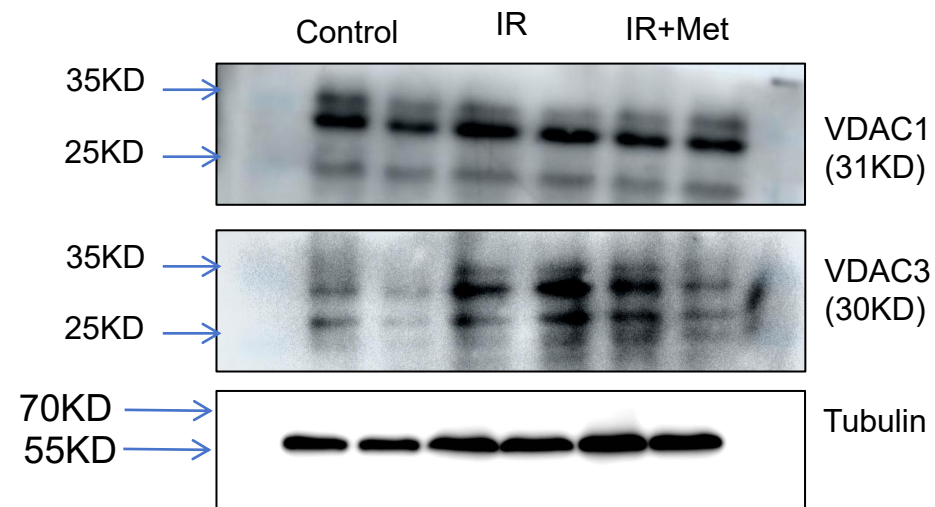

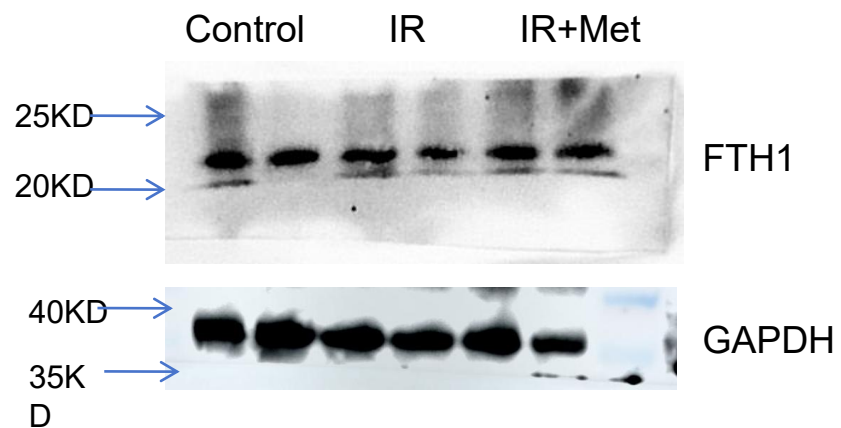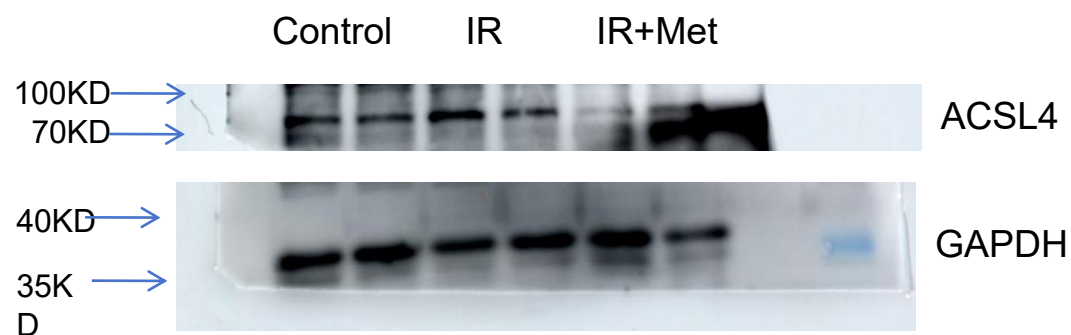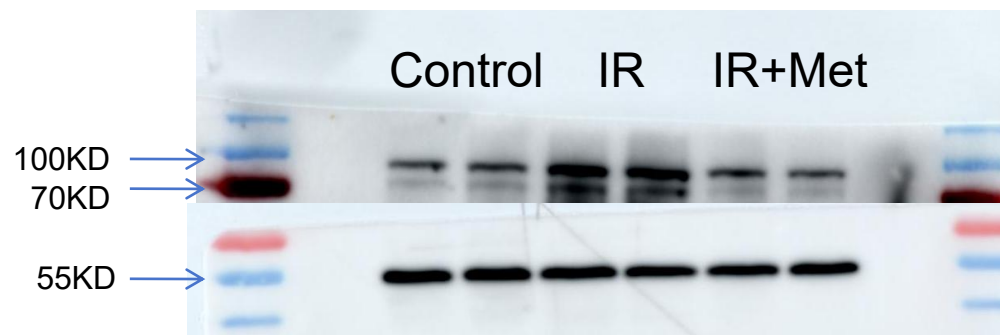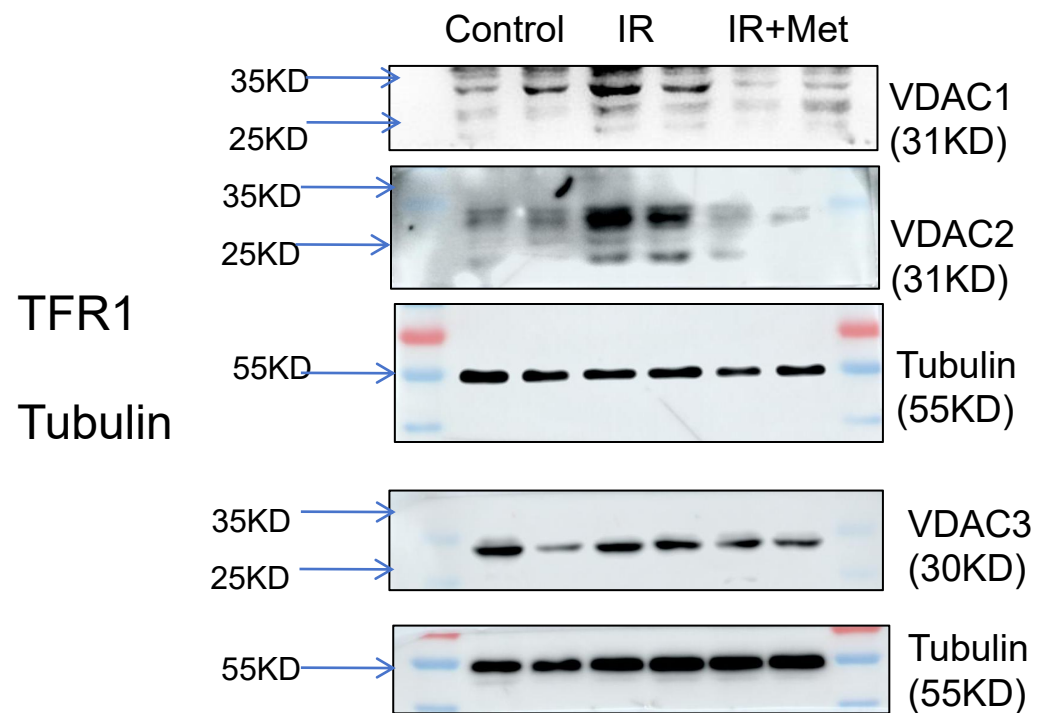

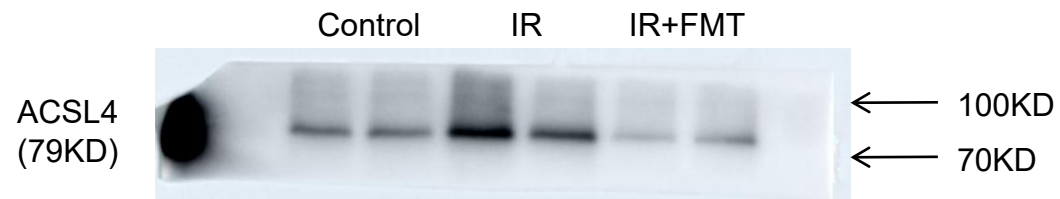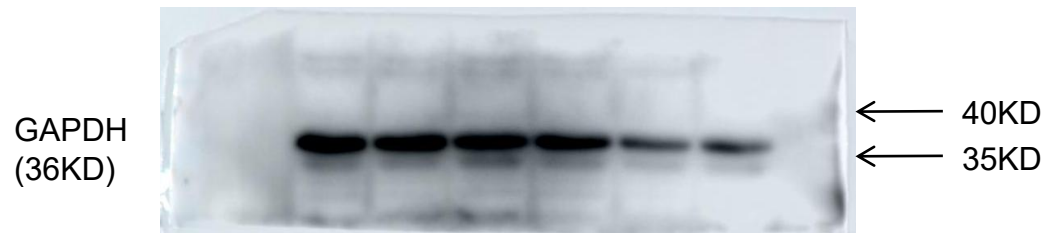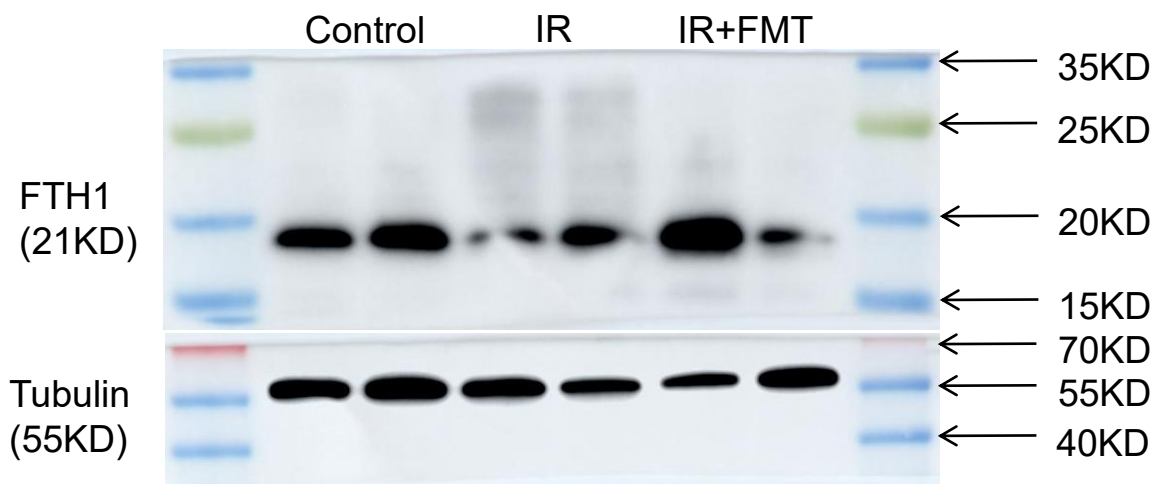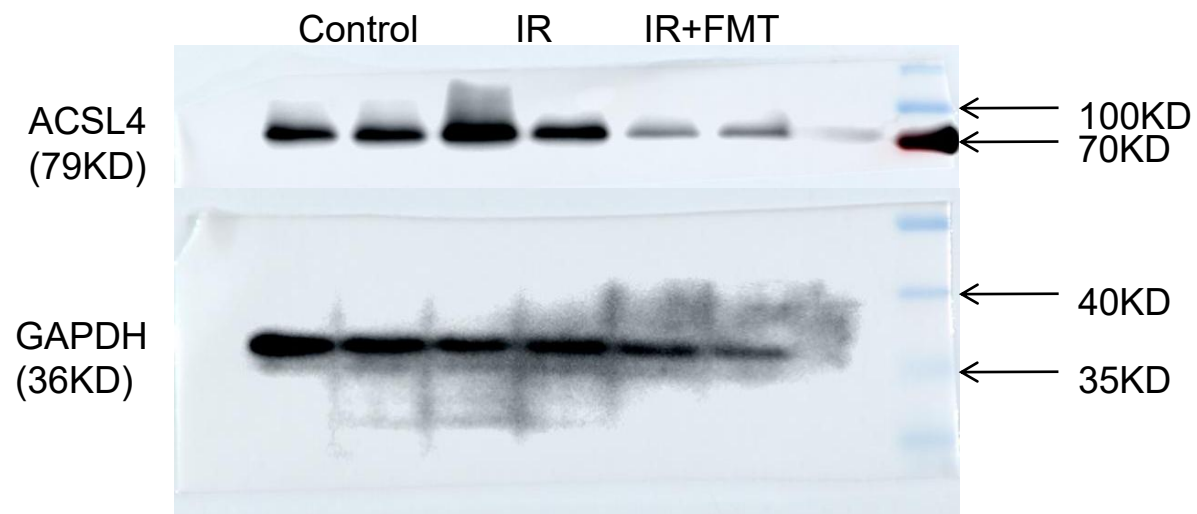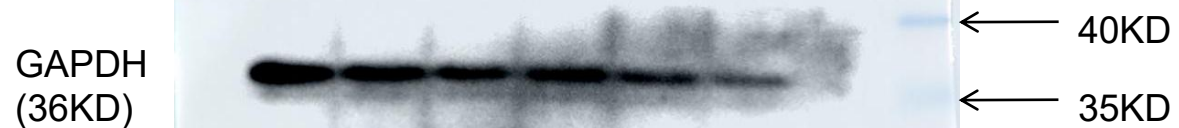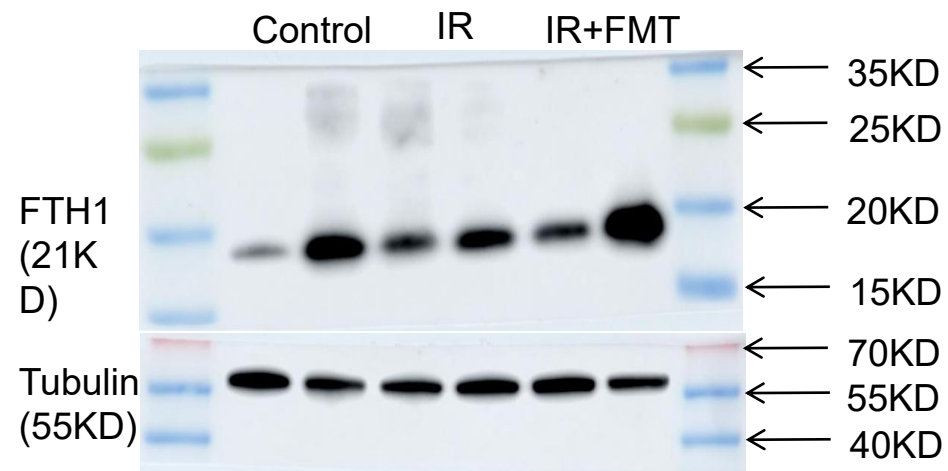

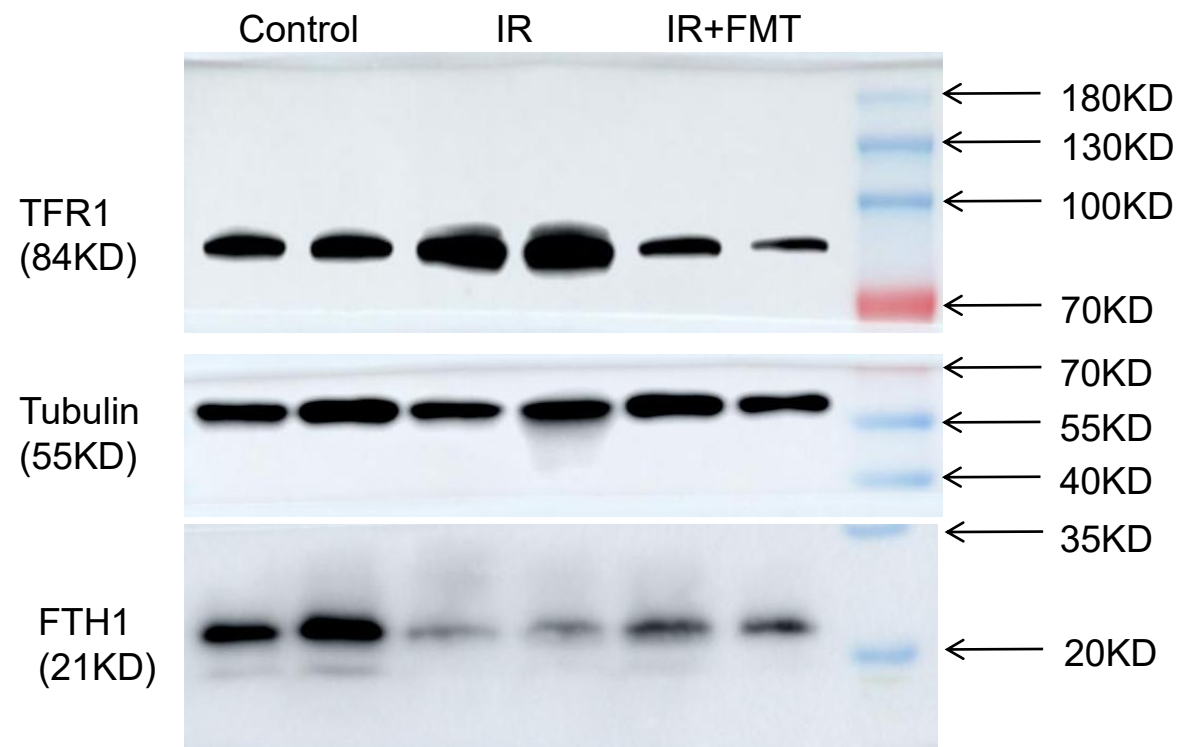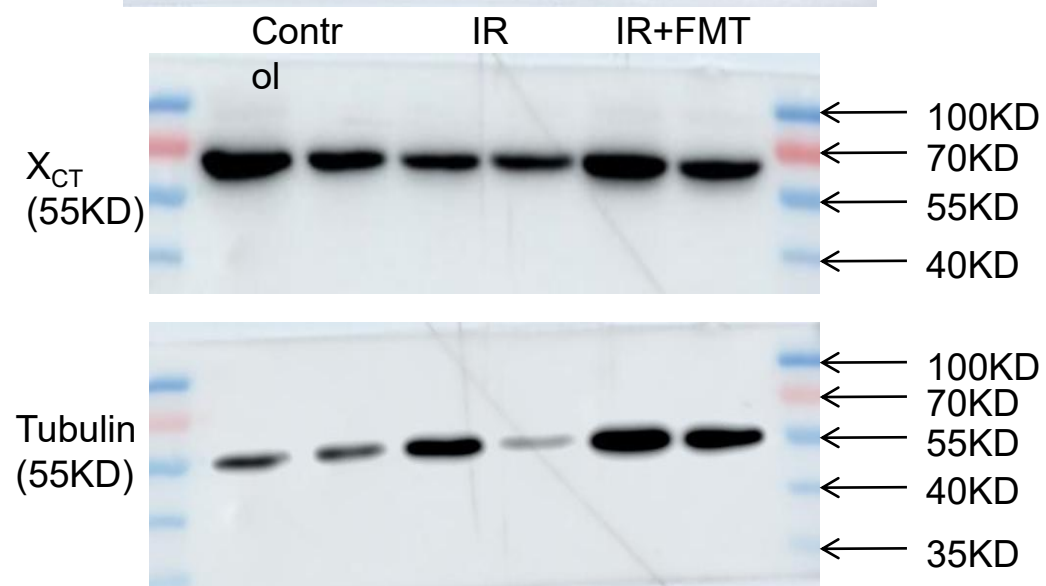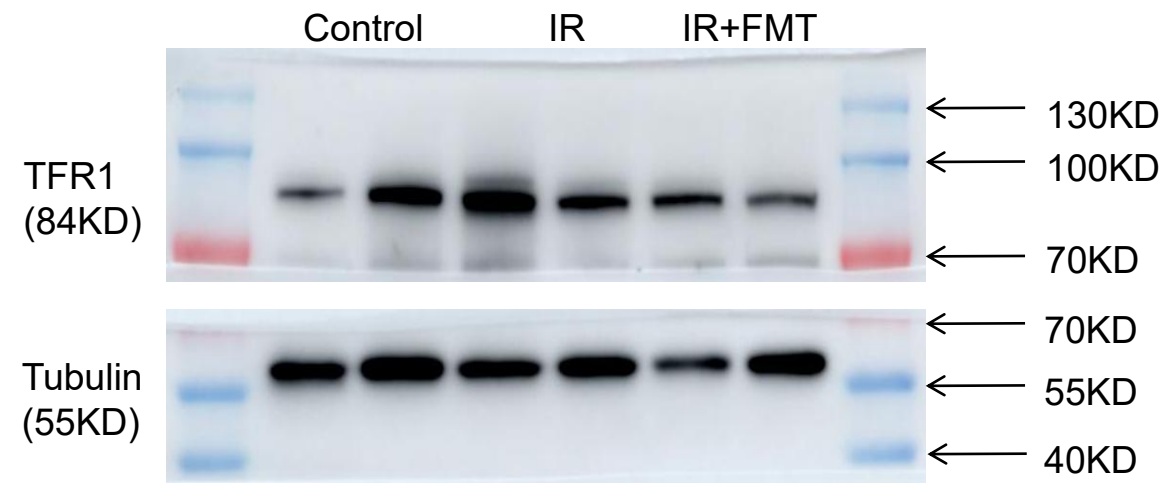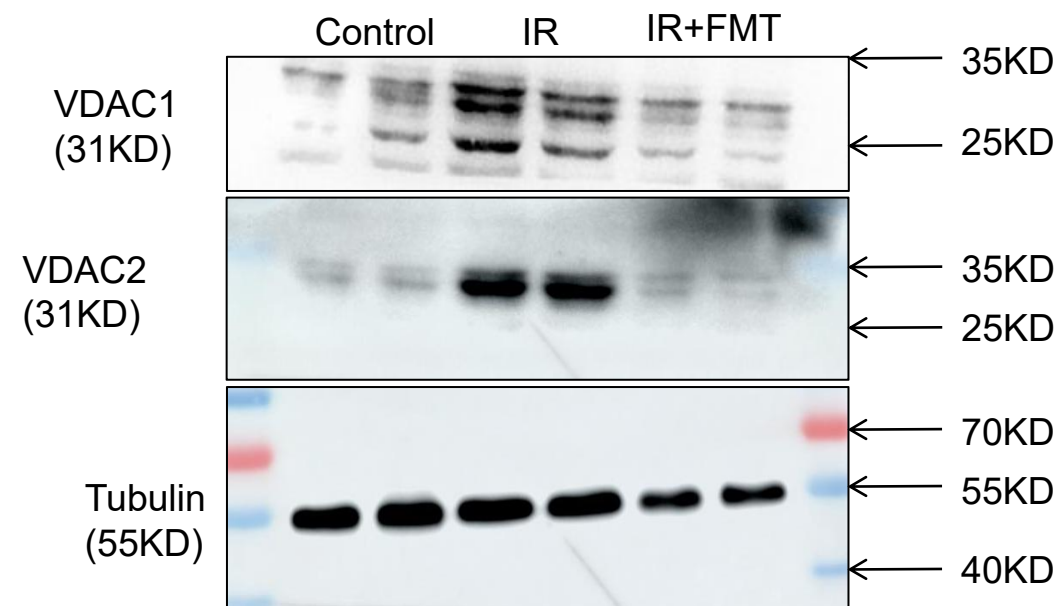

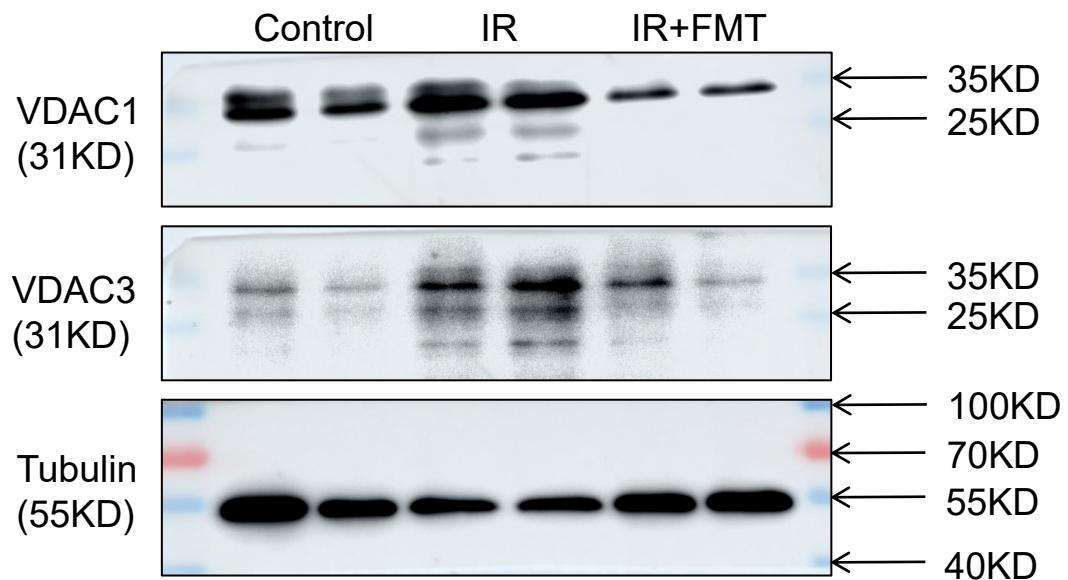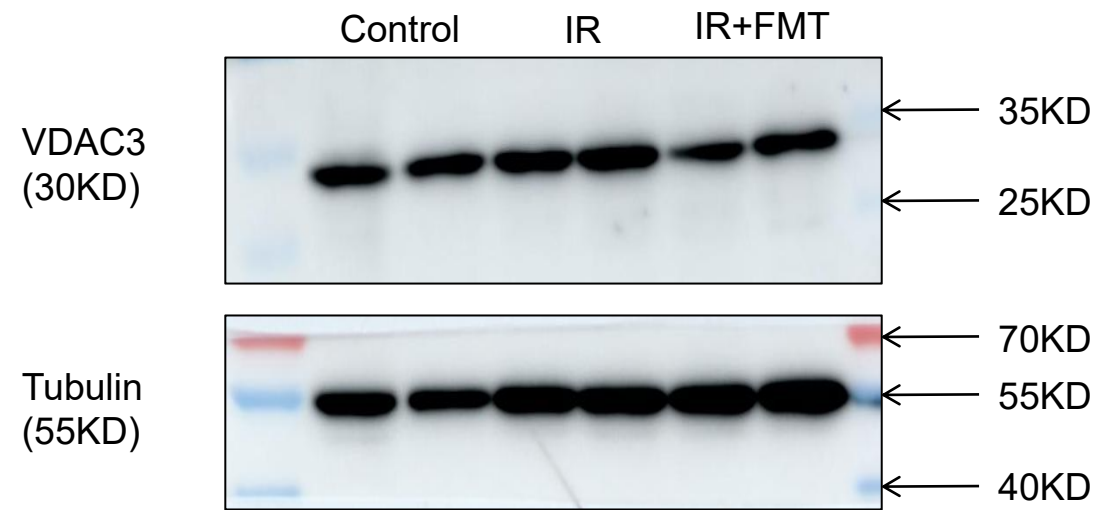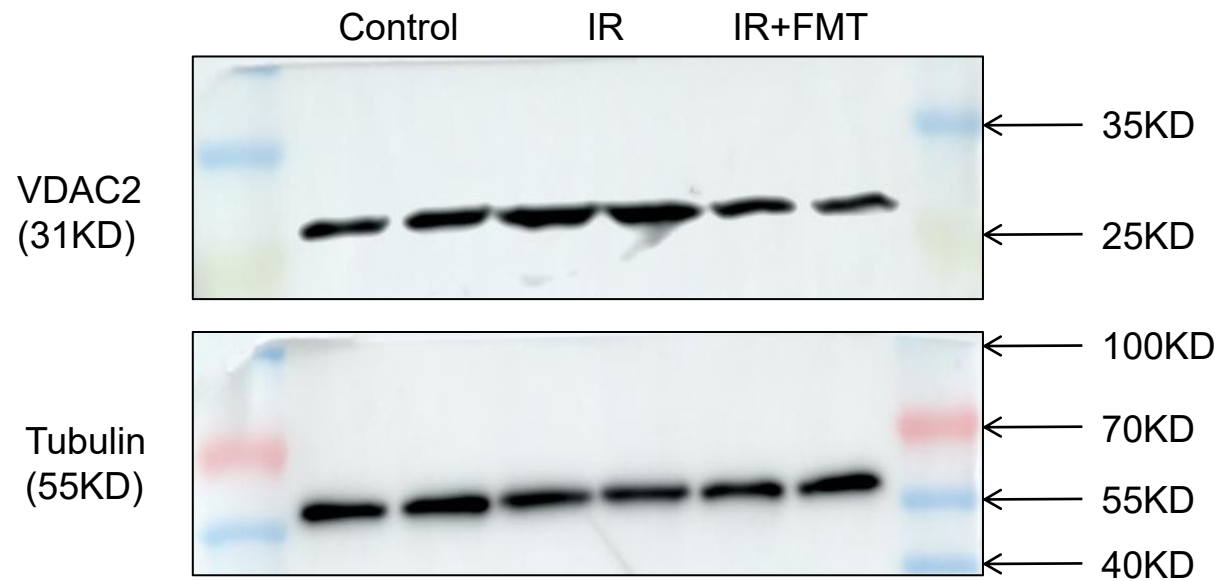

Supplement: fig3-data2 [file elife-89045-fig3-data2-v1.zip]

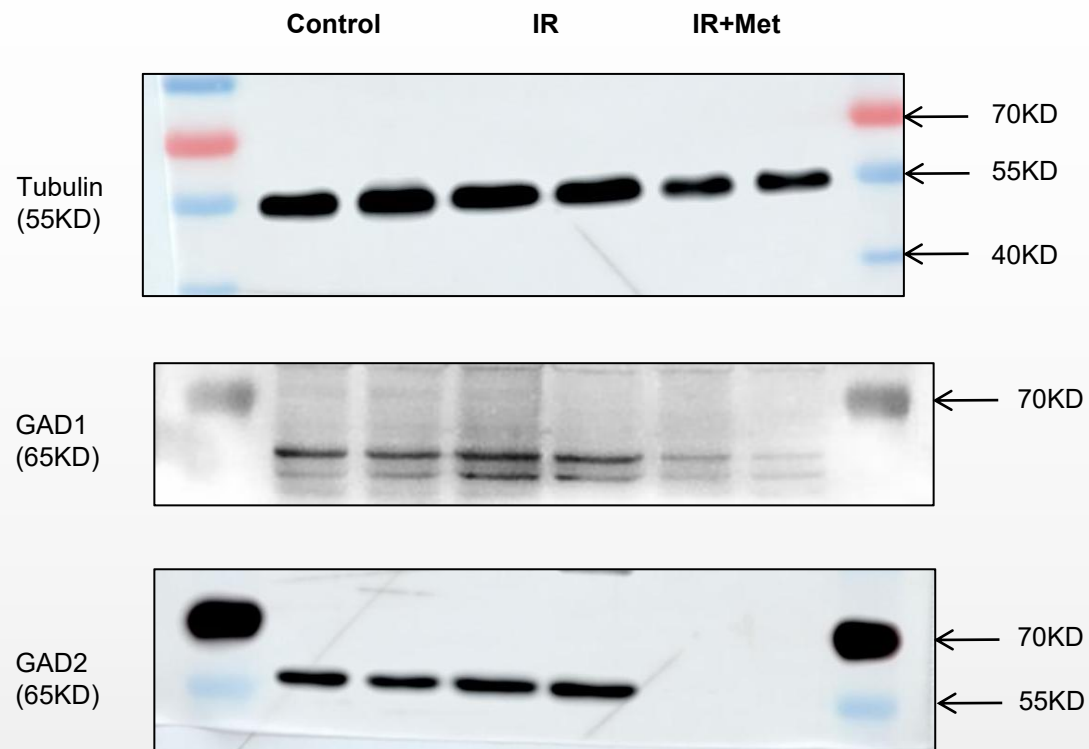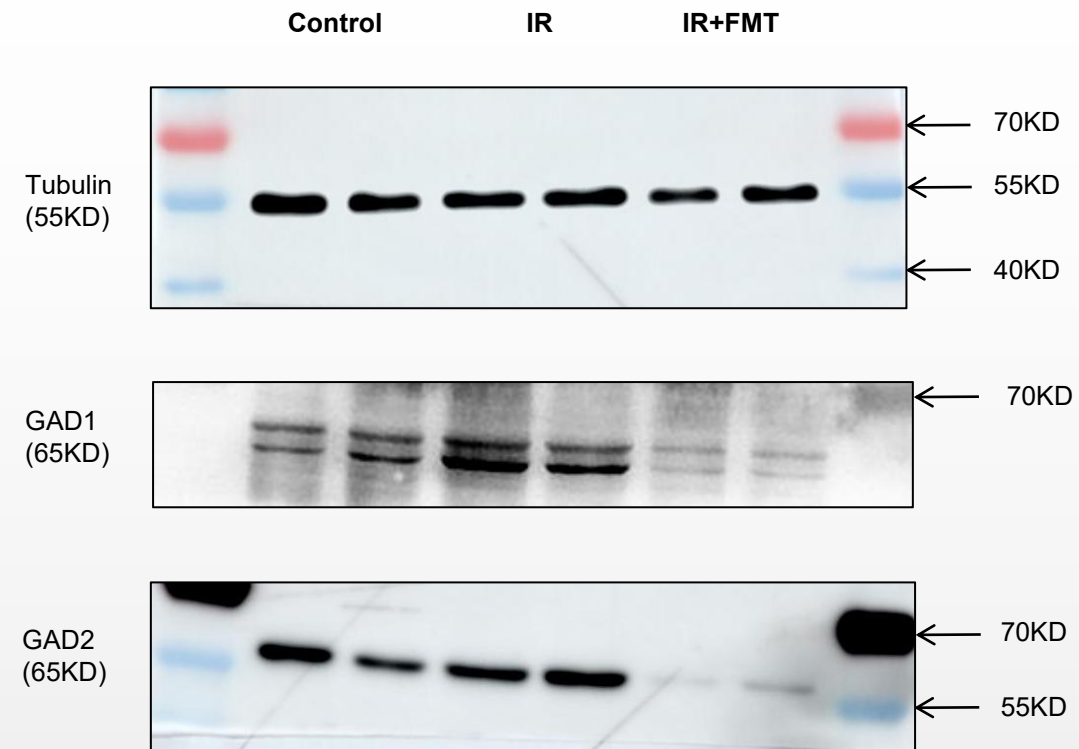

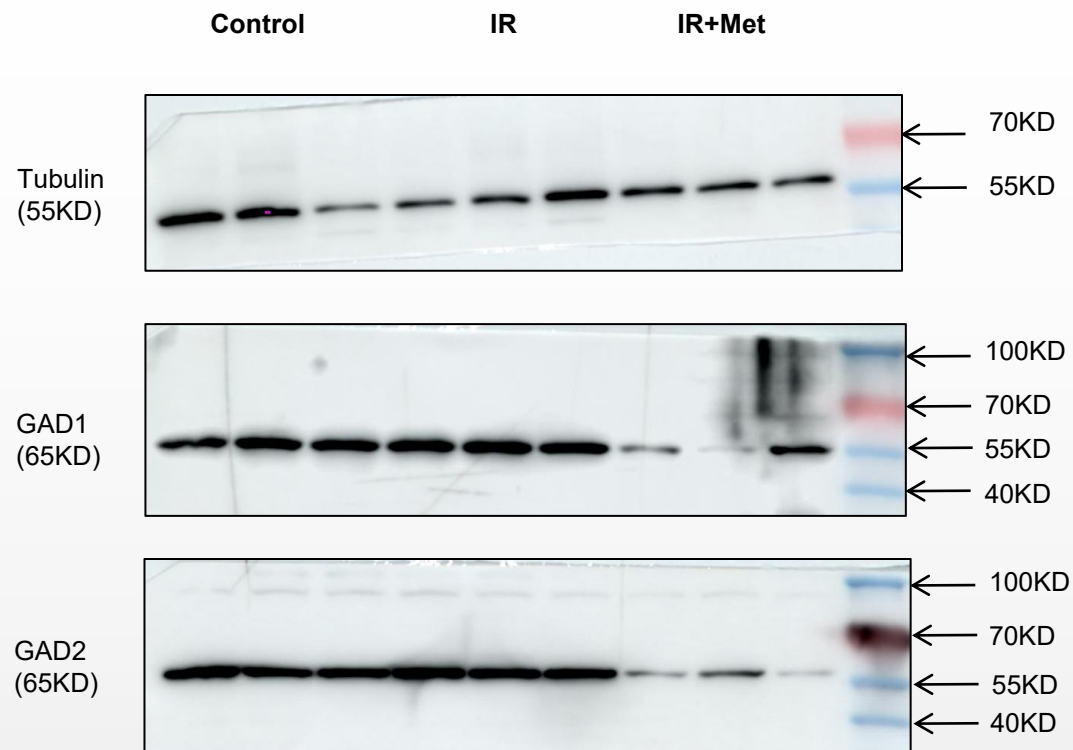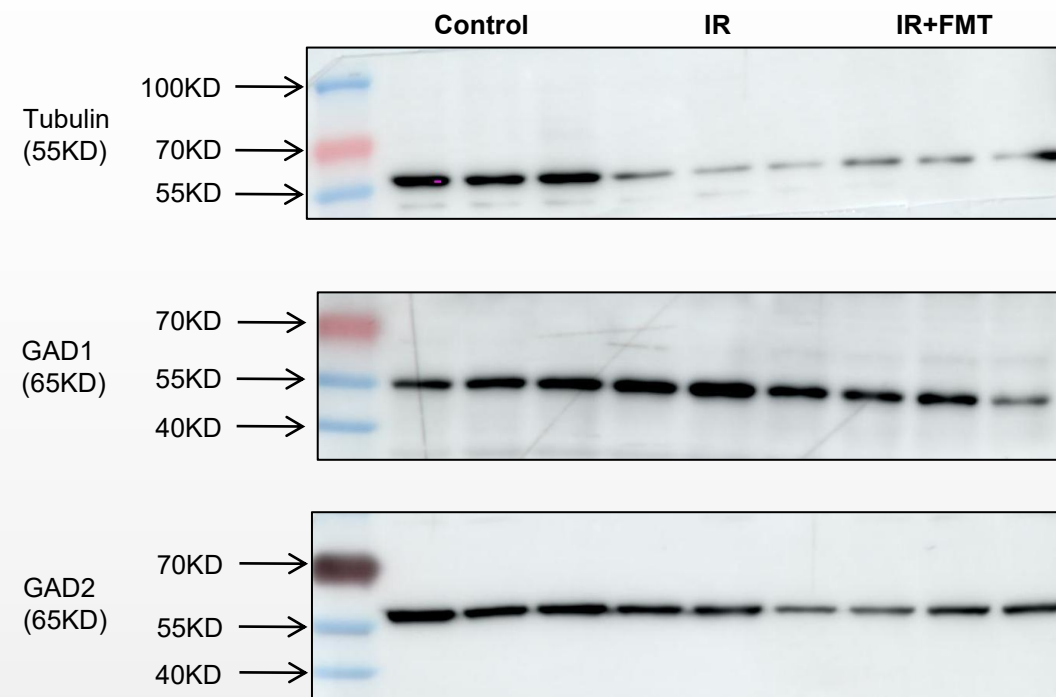

Supplement: fig4-data2 [file elife-89045-fig4-data2-v1.zip]

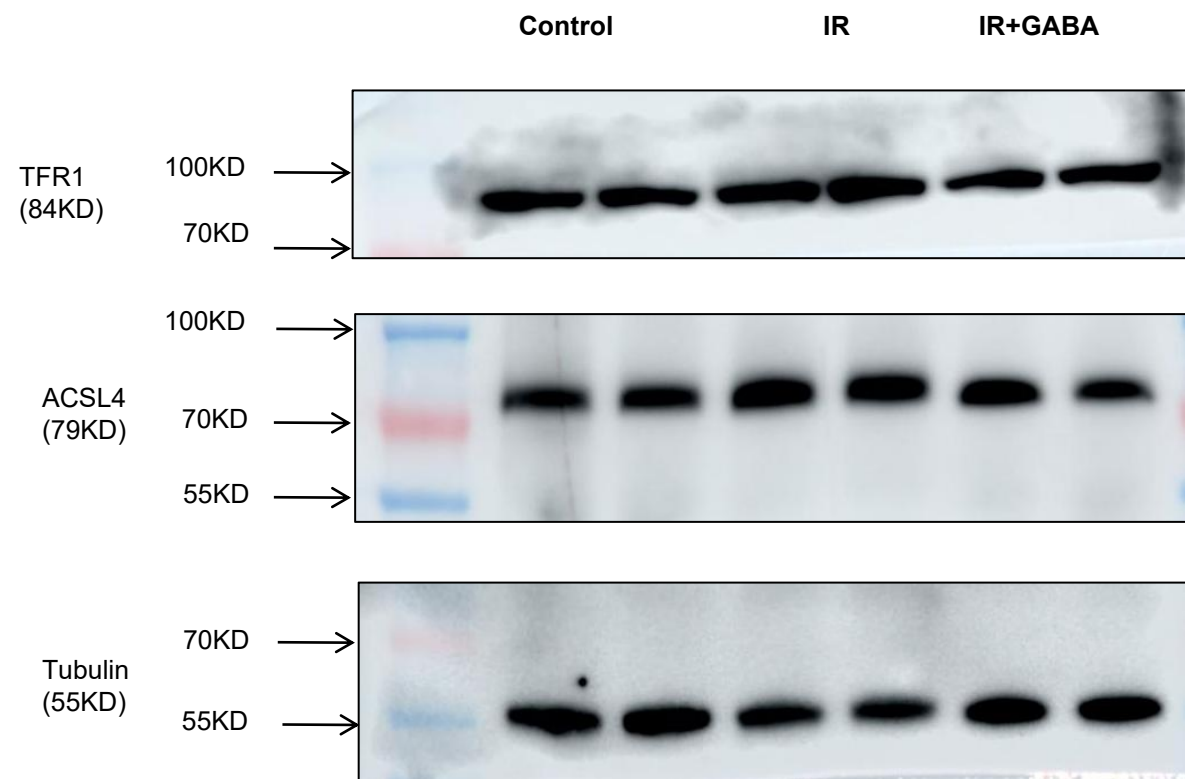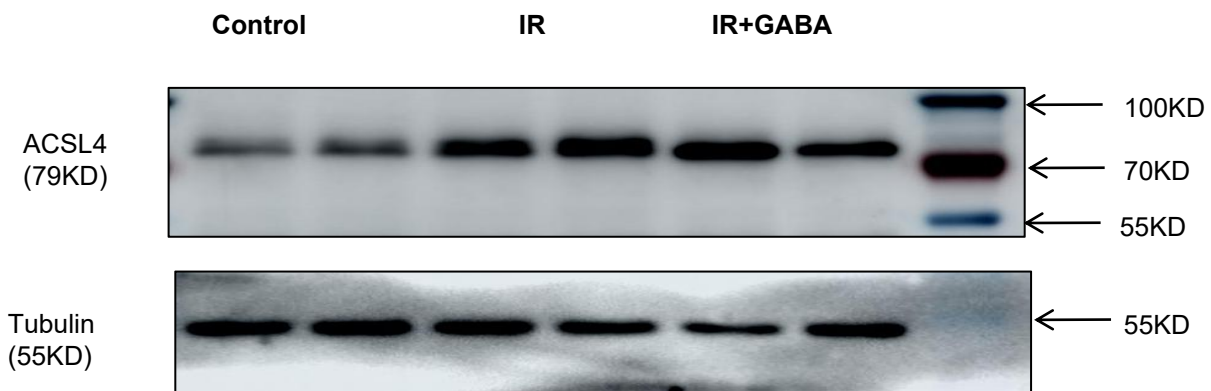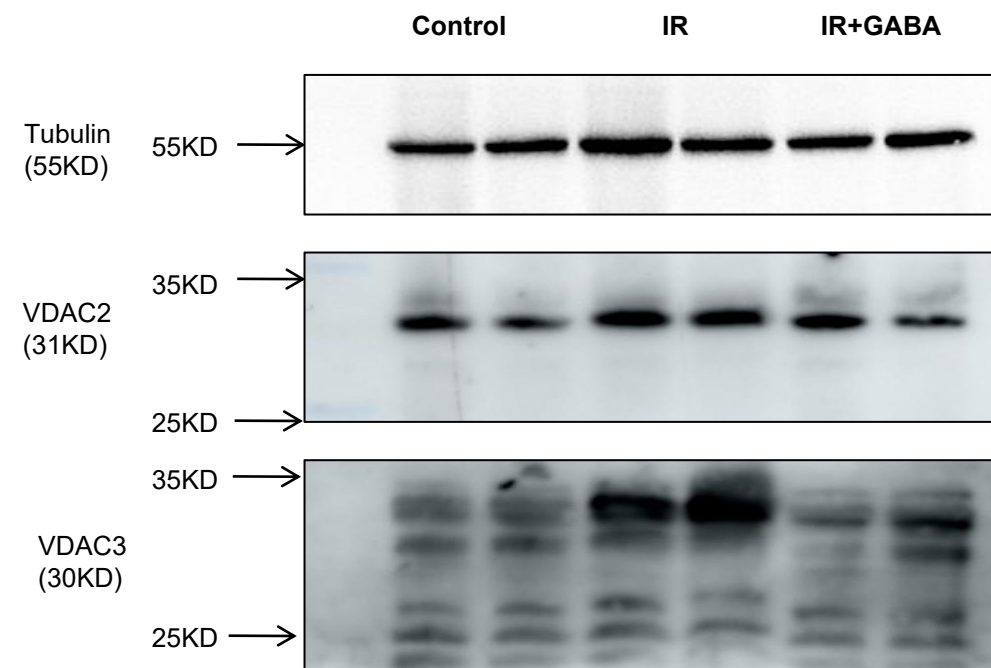

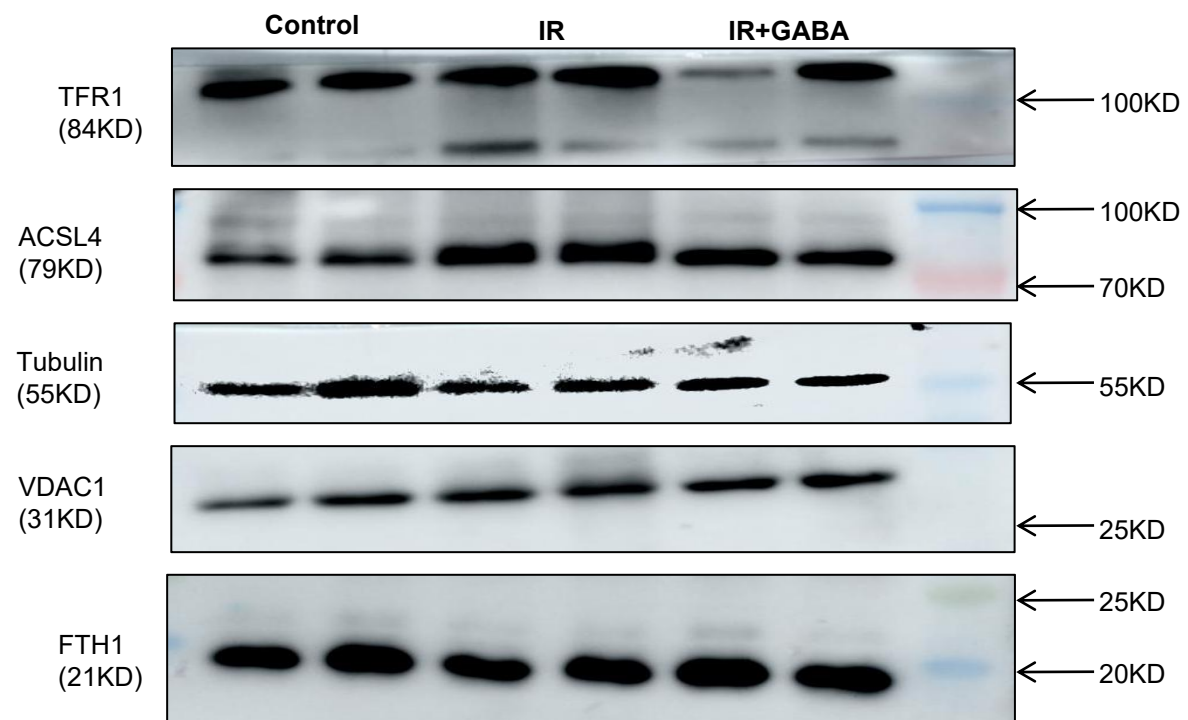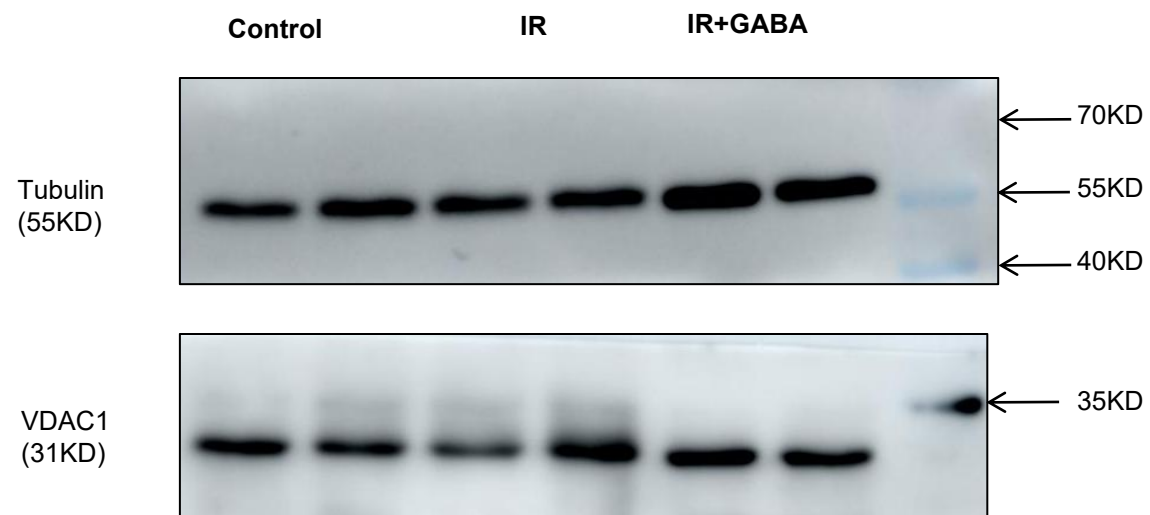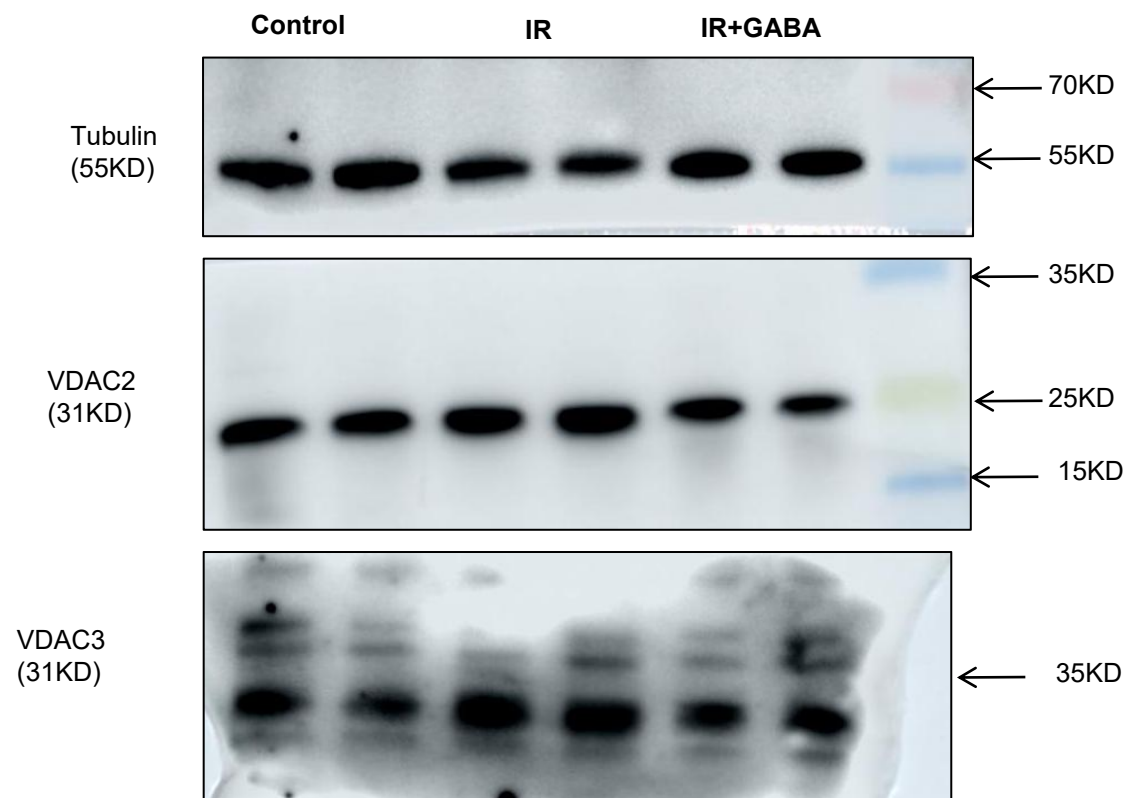

Supplement: fig5-data2 [file elife-89045-fig5-data2-v1.zip]
